# Supplementary material for: Identifying Genetic Signatures of Natural Selection Using Pooled Population Sequencing in Picea abies
Source: PubMed Central journal article supplement (PMC4938651; doi:10.1534/g3.116.028753), 2016-05-02
Supplement: supp_g3.116.028753_FigureS1.pdf [file supp_g3.116.028753_FigureS1.pdf]

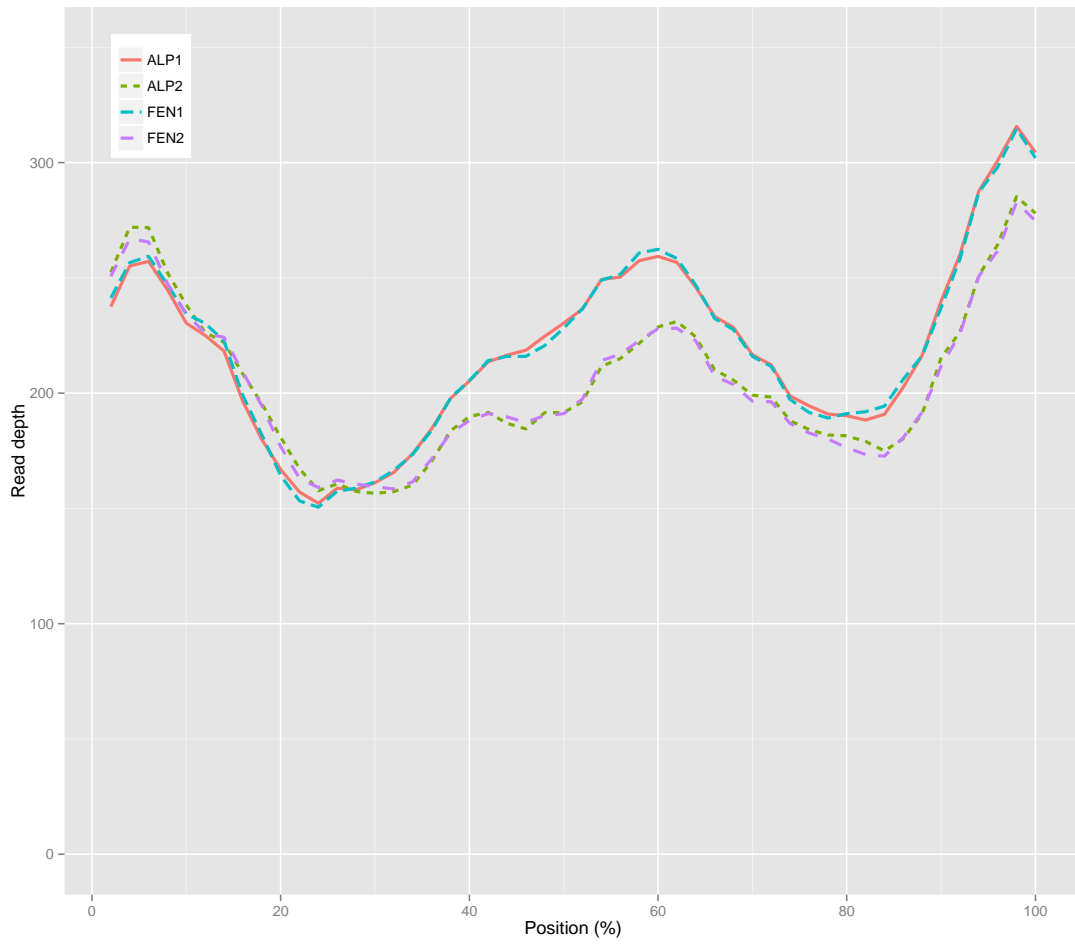

**Figure S1. Mean short-read coverage distributions along the whole gene body.**
