# Supplementary material for: Identifying Genetic Signatures of Natural Selection Using Pooled Population Sequencing in Picea abies
Source: PubMed Central journal article supplement (PMC4938651; doi:10.1534/g3.116.028753), 2016-05-02
Supplement: supp_g3.116.028753_FigureS2.pdf [file supp_g3.116.028753_FigureS2.pdf]

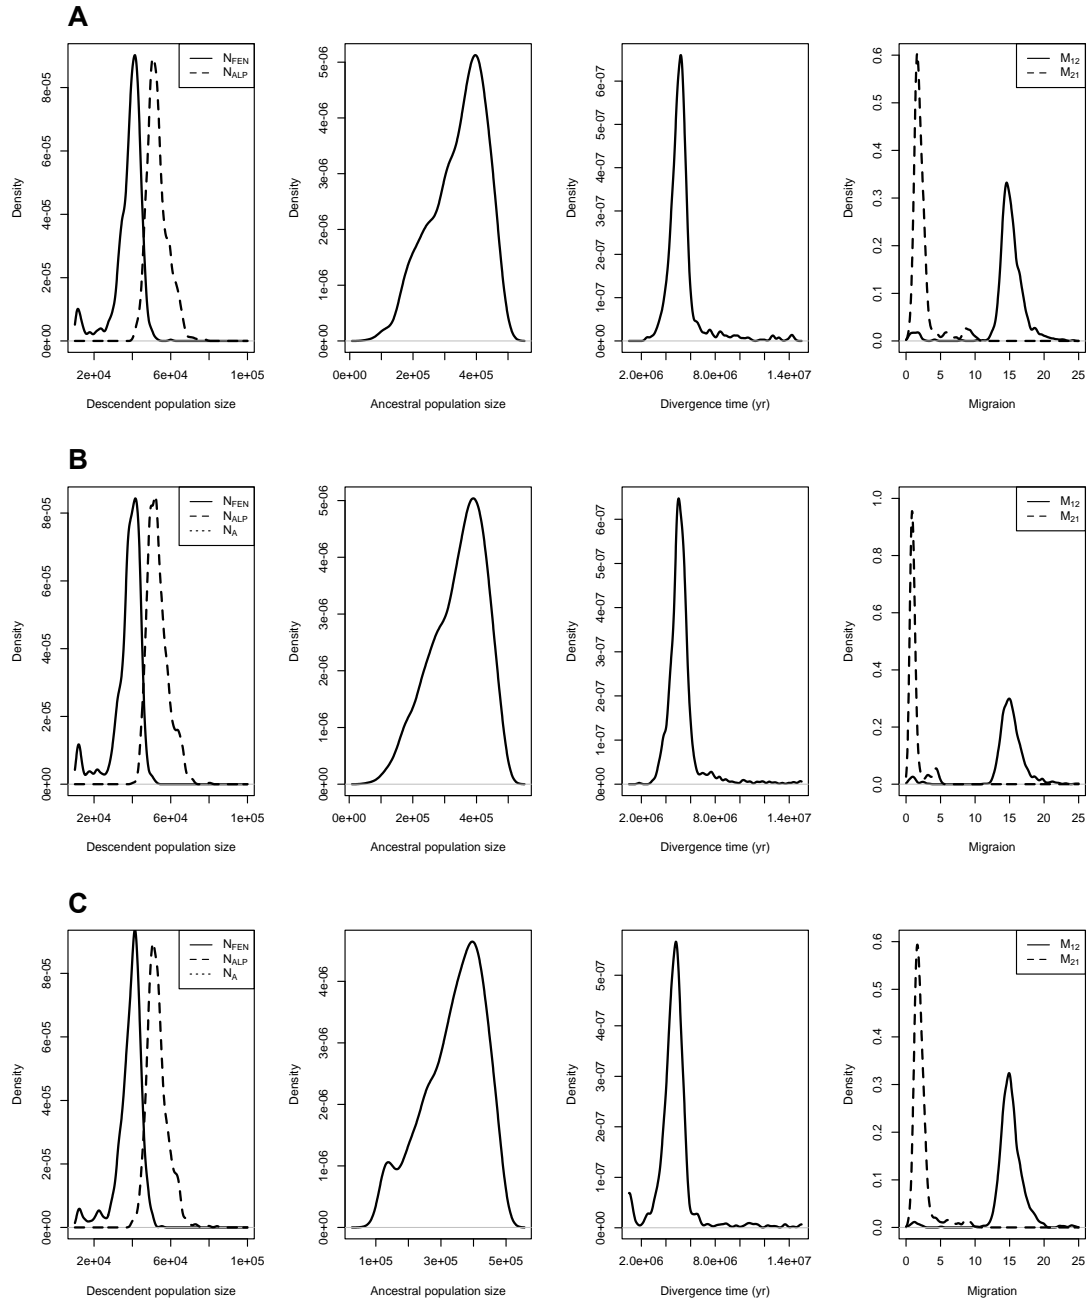

**Figure S2. Marginal distribution of estimated parameters by fastsimcoal2 under (A) constant size model (B) population growth model (C) bottleneck model.  $M_{12}$  represents the migration from FEN to ALP and  $M_{21}$  from ALP to FEN.**
