# Supplementary material for: Identifying Genetic Signatures of Natural Selection Using Pooled Population Sequencing in Picea abies
Source: PubMed Central journal article supplement (PMC4938651; doi:10.1534/g3.116.028753), 2016-05-02
Supplement: supp_g3.116.028753_FigureS3.pdf [file supp_g3.116.028753_FigureS3.pdf]

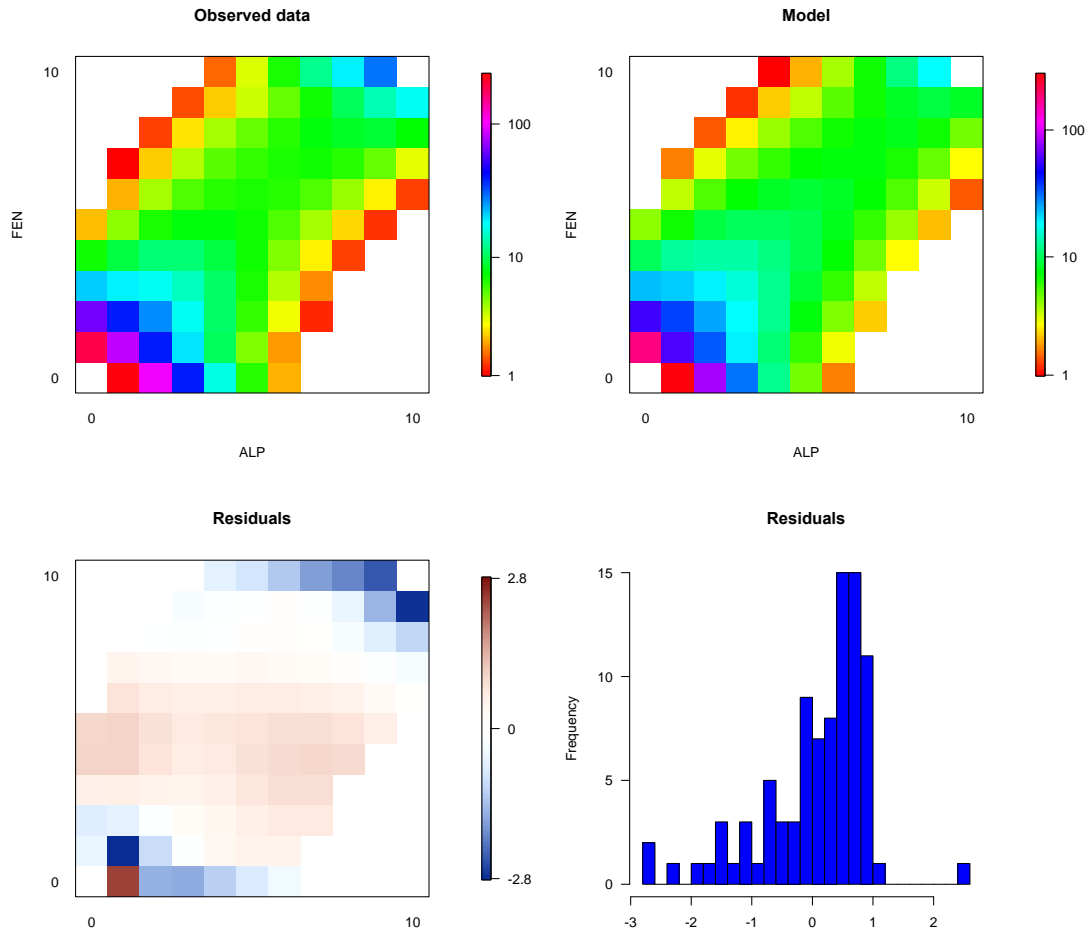

**Figure S3. Comparison of two-dimensional site frequency spectra inferred by fastsimcoal2 with that of observed data.** Allele frequencies are projected into a 10×10 grid. Multinomial comparison was applied by computing Anscombe residuals.
