# Supplementary material for: Identifying Genetic Signatures of Natural Selection Using Pooled Population Sequencing in Picea abies
Source: PubMed Central journal article supplement (PMC4938651; doi:10.1534/g3.116.028753), 2016-05-02
Supplement: supp_g3.116.028753_FigureS4.pdf [file supp_g3.116.028753_FigureS4.pdf]

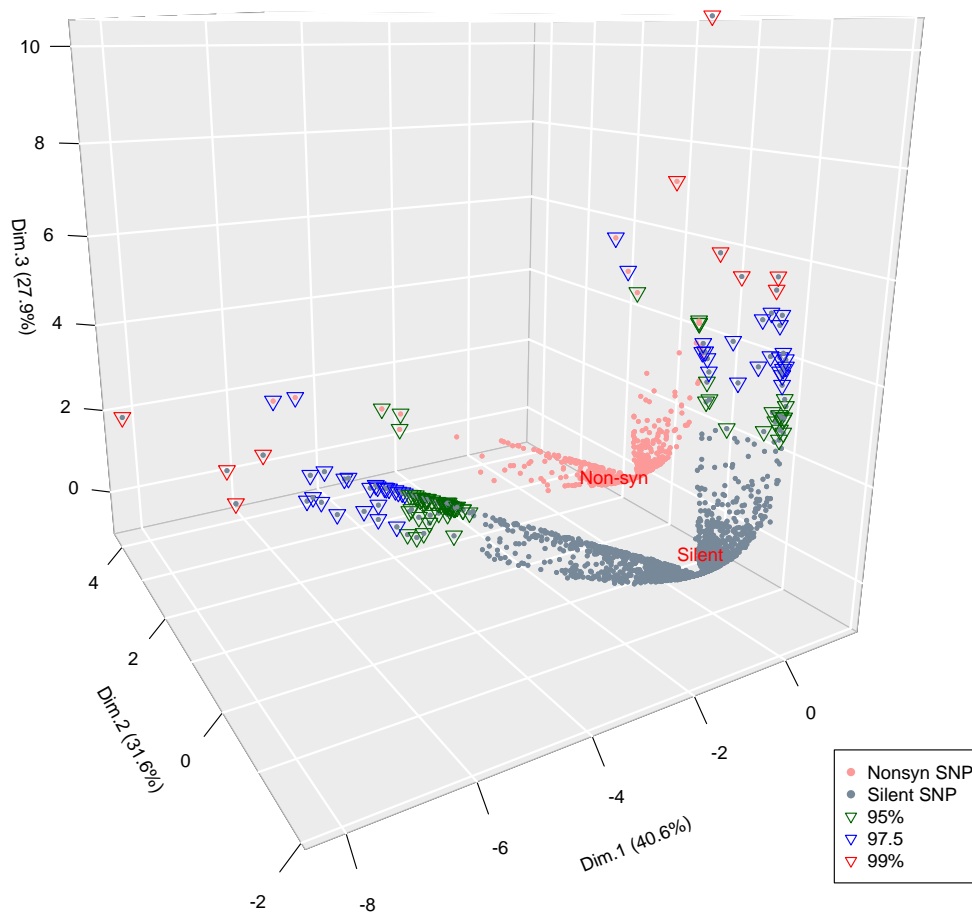

**Figure 4S Divergence distance of non-synonymous and silent SNPs based on FAMD. Outlier SNPs are highlighted with triangles. Colors of triangle show the three cutoffs.**
